First report of the bivalves *Schedocardia* and *Acanthocardia* (Mollusca, Cardiinae) from

Cuba

JOHANSET ORIHUELA<sup>1\*</sup>

<sup>1</sup> Department of Earth and Environment (Geosciences), Florida International University, Miami, Florida 33199, USA, Email: [Jorih003@fiu.edu](mailto:Jorih003@fiu.edu) \* corresponding author

YASMANI CEBALLOS IZQUIERDO<sup>2</sup>

<sup>2</sup> Instituto de Geofísica y Astronomía, calle 212 No.2906 entre 29 y 31, La Coronela, La Lisa, La Habana, Cuba, Email: yasmaniceballos@gmail.com

ROGER W. PORTELL<sup>3</sup>

<sup>3</sup> Florida Museum of Natural History. 1659 Museum Road, University of Florida, Gainesville, FL 32611, USA, Email: portell@flmnh.ufl.edu

## ABSTRACT

Herein we provide the first report of the bivalve genus *Schedocardia* from Cuba derived from the Madruga Formation. Although the Madruga Formation is characterized by a richly diverse fauna including echinoderms, brachiopods, and benthic and planktonic foraminiferans, bivalves were not previously reported. The Madruga Formation is considered late Paleocene in age (Thanetian), but the presence of *Schedocardia* suggests an age extension of the formation into the early Eocene (Ypresian). Moreover, consideration of historical factors that have affected the accepted type locality, and the outcrop discussed here, help provide an alternative interpretation for the presence of shallow water fauna therein.

Keywords: Mollusk; Cardiid; Fossils; Eocene; Madruga; Cuba

## RESUMEN

Se reporta por primera vez el género bivalvo *Schedocardia* de la Formación Madruga, y así también para el registro fósil de Cuba. De la Formación Madruga se ha reportado una rica fauna de invertebrados incluyendo equinodermos, braquiópodos y, especialmente de foraminíferos, pero no moluscos bivalvos. Actualmente, se considera que la Formación Madruga se depositó durante el Paleoceno tardío (Thanetiano), no obstante, la presencia de *Schedocardia* sugieren la extensión de edad de la formación hasta el Eoceno temprano (Ypresiano). La consideración de factores antropogénicos que han afectado la localidad tipo de la formación nos permite ahora una interpretación alternativa del depósito y el ambiente de deposición.

Palabras clave: Molusco; Cardiido; Fósil; Eoceno; Madruga; Cuba

## INTRODUCTION

The Paleocene of Cuba is represented in localized outcrops throughout the island, but the best-known outcrops are perhaps those near the town of Madruga, in central-eastern Mayabeque Province, where a complex of ophiolites, Cretaceous volcanic rocks, and latest Cretaceous, Paleogene and Neogene age sedimentary outcrops also occur (Furrazola-Bermúdez et al., 1964; Albear et al., 1985).

This region has been the subject of paleontological investigations since the early-middle 20<sup>th</sup> century, as part of oil and mineral prospecting by North American companies (De Golyer, 1918; Lewis, 1932a, b; Palmer, 1932; Wright and Sweet, 1924). Based on field trips made between 1929 and 1946 all around Cuba, Palmer (1948) compiled a list of fossil-bearing localities, including more than 70 sites for Madruga. In his publication, Palmer mentioned a locality previously identified by Lewis (1932a) as “*Cut under railroad bridge two kilometers west of Madruga at Central San Antonio*” and cataloged it as a notable locality (Loc. 757 in Palmer, 1948). Since Lewis (1932a) had not selected a holotype (type section) nor did he record its faunal content, Bermúdez (1950) erected the roadcut under the railroad bridge as the type locality for the Madruga Formation (Loc. Bermúdez Sta. 76b) and assigned it a Paleocene age.

This locality was originally described as “Madruga marls” by Lewis (1932a), who erroneously considered it of Late Cretaceous age. Its fossil fauna was reported later by Palmer (1934), Palmer (1932, 1948), Cushman and Bermúdez (1948a, b, 1949), Bermúdez (1938, 1950), Cooper (1955, 1979), and Kier (1984). They had found mostly Cretaceous and Paleocene large foraminifers, but also assemblages consisting of small benthic and planktonic species including several index taxa (Palmer, 1934; Cushman and Bermúdez, 1948a, b, 1949; Bermúdez, 1950; Furrazola-Bermúdez et al., 1964; Lexicon, 2013). Interestingly,

brachiopods, scaphopods, and echinoid fragments were also reported. The brachiopods collected by Palmer, deposited in the U.S. National Museum, were later described and figured by Cooper (1955, 1979). Although these works provide a detailed account of the foraminifer faunule from the Madruga outcrop, bivalves had not been reported, and the echinoids and scaphopods still need investigation.

Recent fieldwork at this locality yielded several interesting, well-preserved fossil bivalve molds, representing a new addition to the fauna of the Madruga Formation undetected in over 80 years of collecting at the site. Furthermore, our new observations contribute to the reinterpretation of the age and environment of deposition of the Madruga Formation.

## MATERIALS AND METHODS

### **Locality**

The Madruga Formation type section and collecting site of the new fossils herein reported is located at a highway cut near the Boris Luis Santa Coloma sugar plantation, outskirts of the town of Madruga, Mayabeque Province: coordinates Lat. 22.906787° N, Long. -81.872793° W, datum WGS 84, altitude 159 m above modern sea level (taken from Google Earth). This is the same location, below the railroad bridge at the Carretera Central west of Madruga town, reported by Palmer (1948) as Loc. 757, and Loc. Sta. 76b in Bermúdez (1950). This section is the current lectostratotype of the Madruga Formation (Albear et al., 1985; Lexicon, 2013). The outcrop section discussed is ~4 m above the highway level, on each side. The fossils herein were collected at a +1 m and +2.5 m (Figure

1). This is nearby the original localities visited by Palmer and Bermudez, but the exact locality of their collecting stations is unknown because they did not indicate them.

## **Geological setting: Lithology and Deposition environment**

The Madruga section has been described as brown or reddish-brown calcareous well-stratified, cemented, greywacke sandstones, sandy-shales, and shales with some conglomerate intercalations. Clastic material is derived from older Cretaceous volcanic-sedimentary rocks, which in the conglomerates can reach from 30 to 40 cm up to 1 to 2 m in diameter. Radiolarian sandstones have been reported (Cushman and Bermúdez, 1948a:68), but the origin of the silica (biogenic or volcanic) is unknown. The age of the unit was originally considered Late Cretaceous by Lewis (1932a:539, 1932b) but later defined as late Paleocene based on several index Foraminifera (Bermúdez, 1950, 1961; Furrázola-Bermúdez et al., 1964; Iturralde-Vinent, 2011).

Stratigraphically, the Madruga Formation lies concordant over the Mercedes Formation and discordant over the Peñalver (Late Cretaceous/early Paleocene) and Via Blanca Formations (Late Cretaceous) (Fig. 2). It is covered concordantly by the Capdevilla Formation (early Eocene) and discordantly by the Cojimar Formation (early-middle Miocene) and Nazareno Formation (late middle Eocene – late Eocene). The Cretaceous rocks ( $K_2^{cp-m?}$ ) can be confused with the overlying Paleocene layers (Albear et al., 1985; Franco, 1992; Lexicon, 2013). At the type locality, these contacts with other formations are not exposed within the outcrop but are exposed at nearby locations. Fossil specimens are sparse and rare throughout the outcrop.

The environment of deposition has been interpreted as from a marine synorogenic piggyback basin of medium to deep depth (bathyal), formed under unstable tectonic environment, transportation, and turbidity currents (Bralower and Iturralde-Vinent, 1997; Iturralde-Vinent and MacPhee, 1999; Iturralde-Vinent et al., 2016). The Apollo and Capdevilla Formations are considered lateral facies representing shallower marine environments, whereas the Nazareno Formation constitute a deeper, more turbid environment (Albear and Iturralde-Vinent, 1985; Fluegeman, 1999). The Cretaceous volcanic arc rocks and the localized ophiolite likely represent a mélangé complex (flyschoid, containing serpentinite and gabbro) exposure in the region. These were likely exposed during western Cuba's major overthrust events of the Eocene (Iturralde-Vinent, 1996, 2011, 2015).

## Abbreviations

*Institutional*— Specimen repository: Paleontology collection of the Madrugá Museum (MPAL). LBF-large benthic foraminifera; PKF, planktonic foraminifera; SBF, small benthic foraminifera.

## RESULTS

### Systematic Paleontology

Class: Bivalvia Linnaeus, 1758

Order: Cardiida Ferussac, 1822

Family: Cardiidae Lamarck, 1809

Cardium Group (sensu Schenider, 2002)

Genus: *Schedocardia* Dall 1900

*Schedocardia* cf. *hatchetigbeensis* (sensu Aldrich, 1886)

157

158 **Specimens-** MPAL-1001, deposited at the paleontology collection of the Museum of  
159 Madrugá city. Collected by Yasmani Ceballos Izquierdo on June 2017, at 3-4 meters west of  
160 the railroad bridge, on the north margin of the roadcut (Figures 1-2).

161 **Description-** The fossil is an incomplete external mold in a calcareous matrix. The external  
162 mold is obliquely quadrate, elliptic-ovoid or schediform in shape (D in Schneider, 2002);  
163 radial ribs are narrow and nearly symmetrical throughout. There are small-simple foramina on  
164 the interstices between the radial ribs, valve margins crenulated. The interstices between  
165 radial ribs are wider than the width of the rib, wider spaced towards valve margin (Fig. 4.2).  
166 External ribs strongly expressed, but not alternating (i.e., wide to narrow) on a central slope.  
167 There are >19 ribs present on our specimen, but the exact number is unknown due to  
168 incompleteness. The spines or their foramina are more pronounced in the lower valve  
169 margins, in the near-symmetrical organization. Only the upper part of the shell/valve is  
170 visible. No spines or nobs present. Flanking ribs closely packed together. Cardinals, muscle  
171 scars, or hinge not visible (Fig. 4). The umbo is generally incomplete, but likely opisthogyal  
172 and wide. Marked, ovoid-shaped and incised foramina occur almost symmetrically along the  
173 curved-space between the valve ribs (Fig. 4.4). In cross-section, these either extend straight  
174 down or curved at the deepest tip. They may be alternating spines.

175 A smaller cardiid specimen is embedded in the same sample opposite this cast (not illustrated  
176 here).

177

178 Family: Cardiidae Lamarck, 1809

179 Cardium Group (sensu Schneider, 2002)

180 Genus: *Acanthocardia* sp.

181 **Specimen-** MPAL-1002 collected by Yasmani Ceballos Izquierdo in May 2019 (Fig. 6). The

small cardiid on MPAL-1001 may represent this genus.

**Description:** External cardinal or round-oval concave shell shape, right anterior cardinal. A large specimen, over 5 cm in length. External radiating ribs strongly expressed on the ventral margin up to the umbo (Fig. 6). At least 20 strong radial ribs can be counted on our specimen. Slightly inequilateral valve with crenulated margins. Nob-like structures are more visible on the spines close to the margin. Internal structures, scars, spines, tubercles or teeth no visible on cast specimen MPAL-1002. Is possible that the valves were not symmetrical. No lateral teeth are evident on the mold. The umbo is partially buried.

## DISCUSSION

### Identification

The specimen (MPAL-1001) is comparable to *Schedocardia waiparana*, *Schedocardia jueca*, and *Schedocardia gatunensis*, in their elliptic-ovate shape of the valve and higher, less oblique shell anteriorly (Fig. 3-5). However, it differs from these three species in having prominent ribs near the umbo, many more costae, interstices that are flat but wide, not narrow, and ribs that do not bear beads (as in *S. gatunensis*). In that sense, our specimen agrees closely with *Schedocardia hatchetigbeensis* in having narrower interstices, lacking rib beads, and having low spines inside these spaces. Since our specimen is largely incomplete, we tentatively refer it here to *S. cf. hatchetigbeensis* (?) until further specimens are available (Fig. 5).

The *Acanthocardia* specimen has an obliquely quadrate shell, with 21 visible ribs, crenulate valve margins and spinose/nodose ribs. Probable double ribs can be seen on the imbricated valve side. Although the specimen is very incomplete, it resembles in overall morph the



species *A. tuberculata*, and *A. echinata* or *A. mucronata*, these last two from the Pleistocene of the Mediterranean. Of these, it resembles *A. turberculata* and *A. echinata* the most in grove-rib pattern. It is not *A. paucicostata* or *A. acaleata* due to the lack of wide and deep grooves between ribs, or lack or notches on poster-dorsal spines. However, the specimen is too incomplete to assign to species.

## Chronology

The Madruga Formation has been formerly assigned to the late Paleocene (upper) by the researchers of the Cuban Geological Lexicon and others (Sánchez-Roig, 1949; Sachs, 1957; Bermúdez, 1950, 1961; Furrázola-Bermúdez et al., 1964; Lexicon, 2013) based on the presence of several index taxa, such as the planktonic foram *Morozovella velascoensis*, index of PKF zone P5, and *Pseudophragmina* (= *Athecocyclina*) *stephensoni*, a large benthic foraminifer or carbonate banks (Özcan et al., 2019). More recently, researchers have extended the age of the formation to the early Eocene (Ypresian) due to the presence of the LBF *Euconuloides wellsi*, which is absent in Paleogene assemblages (Blanco-Bustamante et al., 1999).

The genus *Schedocardia* appears in the fossil record in the late Paleocene (Keen, 1980; Schneider, 2002), but apparently did not have its acme until the Eocene. *Schedocardia hatchetigbeensis* has been reported from the early Eocene (Ypresian) of Alabama and Texas, USA (Toulmin, 1977; Sessa et al., 2012). Other *Schedocardia* species, such as *S. juncea* and *S. gatunensis* are reported from the late Eocene of Panama, Venezuela, Colombia, and Peru (Woodring, 1982). Therefore, the genus is generally considered to be an Eocene indicator (Woodring, 1982:542). The occurrence of *Schedocardia* in the Madruga Formation seems to support the extension of the formation at least to the early Eocene.

Cushman and Bermúdez (1948 a/b) correlated the Madruga Formation with late Paleocene

formations from Alabama and Texas, so it is not so surprising that *S. hatchetigbeensis* appears here. These North American formations are now considered early Eocene (Toulmin, 1977; Sessa et al., 2012).

## Environment

These bivalves are considered facultative mobile infaunal (benthic) suspension feeders (Clarkson, 1986). Their presence, along with multiple large benthic forams (LBF's), echinoids, and brachiopods suggests that after the late Paleocene, during the early Eocene, the area of deposition became a shallower marine environment, like the lateral facies Apollo and Capdevilla Formations, or were redeposited from shallower environments into deeper by more turbid environments (Blanco-Bustamante et al., 1999). The presence of the conglomerates and polymictic elements may suggest closer proximity to a deltaic environment. Moreover, these suggests that at least some of the fauna reported for the Madruga Formation may have originated in shallower waters of a nearby shelf-foreereef environment, transported or reworked by currents or other agents into deeper depositional environments interpreted in the current literature (Albear et al., 1985; Franco et al., 1992; Iturralde-Vinent, 2011; Lexicon, 2013). This interpretation agrees with the overall trend in the orogenic activity of the Cuban terrain during the early-middle Eocene (Bralower and Iturralde-Vinent, 1997; Iturralde-Vinent and MacPhee, 1999; Iturralde, 1996, 2011; Iturralde-Vinent et al., 2016). However, much more evidence is needed to support these observations and hypotheses.

## Limitations and final considerations

Our observations call attention to several limitations that must be considered for our current interpretation of this outcrop and its fauna. The construction of the highway highly disturbed

the area of the outcrop. At the time of the Palmer and Bermúdez visits, those outcrops were well-exposed due to the recent highway construction but are currently severely deteriorated or disturbed by urbanization. Windows into the fossil-bearing strata are rare due to vegetation and soil cover (YCI unp. observations). Former investigators, however, did not take into consideration the anthropogenic alterations inflicted on the local stratigraphy by the construction of the roads (Fig. 1.4, 1.5, 6). These modifications seem to have severely altered or mixed the bedding at our collecting locality (Fig. 7.2), and the horizontality of several beds at several locations. The use of dynamite and heavy machinery likely affected the local stratigraphy and occurrence of its fossil fauna, which up to now has not been considered in any of the published accounts of the outcrop since the 1920s (Fig. 7). Furthermore, the historic photographs taken during the construction of the highway and overpass show the presence of a more lithified outcrop-base than the more friable, marly, polymictic sandstones covered by soil and vegetation of today. It is possible that large boulders that are now present in the outcrop today were positioned there during that time. All these factors, and the presence of these hitherto unreported faunal components prompt a reassessment of the whole outcrop that could help clarify the stratigraphy, fauna, and age of the Madruga Formation and its formational history. Much more data is needed to test some of these initial observations and hypotheses. However, we are confident that such an investigation will reveal a far richer Madruga Formation than currently characterized.

## CONCLUSIONS

The Paleocene bivalve fauna of Cuba has been scantily investigated, although outcrops of marine sedimentary rocks of this age are widespread throughout the island. One of the foremost Paleocene Cuban geologic units is the Madruga Formation, which occurs near the

town of Madruga, in eastern Mayabeque Province. This formation has produced diverse foraminifera, brachiopod, and echinoid faunas, but bivalves up to now have not been reported. Herein, we expand the chronologic and paleoenvironmental setting by reporting the cardiid bivalve genera *Schedocardia* and *Acanthocardia*, which are also first reports for the Cuban fossil record. Historical insight gleaned from photographs taken during the construction of the highway call attention to the high level of disturbance and anthropogenization which the outcrop has been subjected since the late 1920s and cautions as to the depositional and chronologic interpretation of the samples taken there since. Moreover, our observations call for a reassessment of the stratotype outcrop and the Madruga Formation.

## ACKNOWLEDGMENTS

We thank Manuel Iturralde-Vinent for his observations and comments that greatly improved earlier versions of the manuscript, and to Jan Johan ter Poorten for his aid in the identification of the *Schedocardia* specimen. Madruga city historian Carlos Miguel Suárez Sardiñas, for proving important historical insight, historical photographs, and aid during the fieldwork. Our manuscript was improved by the comments and suggestions of Lazaro Viñola López.

## REFERENCES

Albear, J. F. and Iturralde-Vinent, et al. 1977. Memoria explicativa del mapa geológico escala 1:250 000 de las provincias de La Habana (unpublished). Fondo Geológico de Cuba, Instituto de Geología y Paleontología de la Academia de Ciencias de Cuba, La Habana, Cuba.

- 306 Albear, J. F., Iturralde-Vinent, M., Furrazola-Bermúdez, G., and Sánchez-Arango, J. R. 1985.
- 307       Contribución a la geología de las provincias de La Habana y Ciudad de la Habana.
- 308       Editorial Científico-Técnica, La Habana.
- 309 Aldrich, T. H. 1886. Preliminary report on the Tertiary fossils of Alabama and Mississippi.
- 310       *Bulletin of the Geological Survey of Alabama*, part I:15–60.
- 311 Bermúdez, P. J. 1938. Nueva especie de *Bulimina* del Cretácico Superior cubano. *Memorias*
- 312       *de la Sociedad Cubana de Historia Natural “Felipe Poey”*, 12(2):80–90.
- 313 Bermúdez, P. J. 1950. Contribución al estudio del Cenozoico cubano. *Memorias de la*
- 314       *Sociedad Cubana de Historia Natural “Felipe Poey”*, 19(3):204–375.
- 315 Bermúdez, P. J. 1961. *Las Formaciones Geológicas de Cuba*. Ministerio de Industrias,
- 316       Instituto Cubano de Recursos Minerales, Geología Cubana, No. 1:1–177.
- 317 Bralower, T., and Iturralde-Vinent, M. 1997. Micropaleontological dating of the collision
- 318       between the North American continental margin and the Greater Antilles Volcanic Arc
- 319       in Western Cuba. *Palaaios*, 12:133–150, DOI: 10.2307/3515303.
- 320 Blanco-Bustamante, S. Fernández-Rodríguez, G., and Fluegeman, R. H. 1999. A note on the
- 321       Biostratigraphy of Paleocene-Eocene Larger Foraminifera from Western Cuba.
- 322       *Micropaleontology*, 45(2):19–26.
- 323 Cooper, G.A., 1955. New brachiopods from Cuba. *Journal of Paleontology*, 29(1):64–70.
- 324 Cooper, G.A., 1979. Tertiary and Cretaceous brachiopods from Cuba and the Caribbean.
- 325       *Smithsonian Contributions to Paleobiology*, 37:1–56.
- 326 Cushman, J.A., and Bermúdez, P.J., 1948 (a). Some Paleocene foraminifera from the
- 327       Madrugá Formation of Cuba. *Contributions for the Cushman Laboratory for*
- 328       *Foraminiferal Research*, 24:68–75.

- 329 Cushman, J.A., and Bermúdez, P.J., 1948 (b). Additional species of Paleocene foraminifera  
330 from the Madruga Formation of Cuba. *Contributions for the Cushman Laboratory for*  
331 *Foraminiferal Research*, 24:85–89.
- 332 Cushman, J. A., and Bermúdez, P. J. 1949. Some Cubans species of Globorotalia.  
333 *Contributions for the Cushman Laboratory for Foraminiferal Research*, 25:26-45.
- 334 Dall, W. H. 1900. Contributions to the Tertiary fauna of Florida with special reference to  
335 Silex Beds of Tampa and the Pliocene beds of the Caloosahatchee River. Part V.  
336 Teleodermacea: Solen to Diplodonta. *Transactions of the Wagner Free Institute of*  
337 *Science*, 3:949–1218.
- 338 De Golyer, E. 1918. The geology of Cuban petroleum deposits. *American Association of*  
339 *Petroleum Geologists Bulletin*, 2:133–167.
- 340 Fluegeman R. H., and Aubry, M.P. 1999. Lower Paleogene biostratigraphy of Cuba.  
341 *Micropaleontology*, 45(2):1–91.
- 342 Franco-Álvarez, G.L., Acevedo-González, M., Álvarez-Sánchez, H., Artime Peñeñori, C.,  
343 Barriento-Duarte, A., Blanco-Bustamante, S., Cabrera, M., Cabrera, R., Carassou  
344 Agragan, G., Cobiella-Reguera, J.L., Coutin Lambert, R., De Albear, J.F., De Huelbes  
345 Alonso, J., De la Torre y Callejas, A., Delgado Damas, R., Díaz de Villalvilla, L.,  
346 Diaz-Otero, C., Dilla Alfonso, M., Echevarría-Hernández, B., Fernández-Carmona, J.,  
347 Fernández-Rodríguez, G., Flores-García, R., Florez-Abín, E., Fonseca, E., Furrázola-  
348 Bermúdez, G., García-Delgado, D., Gil-González, S., González García, R.A.,  
349 Gutiérrez-Domech, R., Linares-Cala, E., Milián García, E., Millán-Trujillo, G.,  
350 Moncada Ferrera, M., Montero Zamora, L., Orbera, L., Ortega-Sastriques, F.,  
351 Peñalver-Hernández, L.L., Perera, C., Pérez Arias, J.R., Pérez Lazo, J., Pérez  
352 Rodríguez, E., Pifheiro Pérez, E., Recio Herrera, A.M., Sánchez-Arango, J.R.,  
353 Saunders Pérez, E., Segura-Soto, R., Triff-Oquendo, J., Zuazo Alonso, A.,

- 354 Pszczółkowski, A., Brezsnyánszky, K., Slavov, I., and Myczyński, R., 1992. *Léxico*
- 355 *Estratigráfico de Cuba*. Centro de Nacional de Información Geológica, La Habana, 1-
- 356 658.
- 357 Furrázola-Bermúdez, G., Judoley, C. M., Mijailovskaya, M. S., Miroljubov, Y. S.,
- 358 Novojatsky, I. P., Nuñez Jiménez, A., and Solsona, J. B. 1964. *Geología de Cuba*.
- 359 Editorial Nacional de Cuba, La Habana.
- 360 Garvie, C. L. 2013. Studies on the molluscan paleomacrofauna of the Texas Paleogene.
- 361 *Bulletin of American Paleontology*, 384-386:1–222.
- 362 Keen, A. M. 1980. The pelecypod family Cardiidae: a taxonomic summary. *Tulane Studies in*
- 363 *Geology and Paleontology*, 16:1-40.
- 364 Kier, P. 1984. Fossil spatangoid echinoids of Cuba. *Smithsonian Contributions to*
- 365 *Paleobiology*, 55:1-336.
- 366 Iturralde-Vinent, M. 1995. Cuencas sedimentarias del Paleoceno-Eoceno de Cuba. *Boletín de*
- 367 *la Sociedad Venezolana de Geología*, 20 (1-2):75–80.
- 368 Iturralde-Vinent, M., 2011. Geología de las rocas del Arco Volcánico del Paleógeno. En:
- 369 Compendio de Geología de Cuba y del Caribe. Segunda Edición (published December
- 370 2012), DVD-ROM. Editorial CITMATEL, ISBN: 9-789592-572863.
- 371 Iturralde-Vinent, M. 2015. Estratigrafía de las cuencas sinorogénicas del Campaniano tardío
- 372 al Daniano desarrolladas sobre rocas de arco volcánico y retroarco en Cuba. *Anuario*
- 373 *de la Sociedad Cubana de Geología*, No. 2:27–50.
- 374 Iturralde-Vinent, M., 2011. Cuencas sinorogénicas del Campaniano tardío al Eoceno Superior,
- 375 desarrolladas sobre rocas del arco volcánico y máfico-ultramáficas. En: Compendio de
- 376 Geología de Cuba y del Caribe. Segunda Edición, DVD-Rom. Editorial CITMATEL,
- 377 ISBN: 9-789592-572863. Premio Academia de Ciencias de Cuba 2011.

378 Iturralde-Vinent, M., García-Casco, A., Rojas-Agramonte, Y., Proenza-Fernández, J.A.,  
379 Murphy, J.B., and Stern, R.J., 2016. The geology of Cuba: A brief overview and  
380 synthesis. *GSA Today*, 26(10):4–10, DOI: 10.1130/GSATG296A.1.

381 Iturralde-Vinent, M., and MacPhee, R.D.E. 1999. Paleogeography of the Caribbean region,  
382 implications for Cenozoic biogeography. *Bulletin of American Museum Natural*  
383 *History*, (238):1–95.

384 Lamarck, J. B. 1809. *Philosophie Zoologique*. Musée d'Histoire Naturelle, Paris.

385 Lewis, J.W., 1932 (a). Geology of Cuba (with discussion by R. J. Metcalf). *American*  
386 *Association of Petroleum Geologists Bulletin*, 16(6):533–555.

387 Lewis, J.W., 1932 (b). Occurrence of oil in igneous rocks in Cuba. *American Association of*  
388 *Petroleum Geologists Bulletin*, 16(8): 809–818.

389 Linnaeus, C. 1758. *Systema Naturae*. Laurentii Salvii, Homiae.

390 Özcan, E., Mitchell, S.F., Less, G., Robinso, E., Bryan, J.R., Pignatti, J., and Osman, Al.  
391 2019. A revised suprageneric classification of American orthophragminids with  
392 emphasis on late Paleocene representatives from Jamaica and Alabama. *Journal of*  
393 *Systematic Palaeontology*. <https://doi.org/10.1080/14772019.2018.1539778>

394 Palmer, K.V. and Brann, D.C. 1965. Catalogue of the Paleocene and Eocene Mollusca of the  
395 southern and eastern United States. Part 1. Pelecypoda, Amphineura, Peteropoda,  
396 Scaphopoda, and Cephalopoda. *Bulletins of American Paleontology* 48:1-471

397 Palmer, D.K., 1934. Some large foraminifera from Cuba. *Memorias de la Sociedad Cubana*  
398 *de Historia Natural "Felipe Poey"*, 8(4):235–269.

399 Palmer, R.H., 1932. Informe geológico del área de Madruga. Oficina Nacional de Recursos  
400 Minerales, Ministerio de Energía y Minas, La Habana (Inédito).

401 Palmer, R.H., 1938. Field guide to geological excursion in Cuba. Secretaría de Agricultura,  
402 Panfleto, 1–12.



- Palmer, R.H., 1948. List of Palmer Cuban fossil localities. *Bulletin of American Paleontology*, 31(128):1–178.
- Sánchez-Roig, M., 1949. *Paleontología Cubana I: Los Equinodermos Fósiles de Cuba*. Compañía Editora de Libros y Folletos, La Habana, 1:1–330.
- Sachs, K. N. 1957. Restudy of some Cuban larger foraminifera. *Contributions from the Cushman Foundation for Foraminiferal Research*, VIII (3):106–120.
- Sessa, J.A., Bralower, T.J., Patzkowsky, M.E., Handley, J.C. and Ivany, L.C. 2012. Environmental and biological controls on the diversity and ecology of Late Cretaceous through early Paleogene marine ecosystems in the US Gulf Coastal Plain. *Paleobiology* 38(2):218–239
- Schneider, J. 2002. Phylogeny of cardiid bivalves (cockles and giant clams): revision of the Cardiinae and the importance of fossils in explaining disjunct biogeographical distributions. *Zoological Journal of the Linnean Society*, 136:321–369.
- Toulmin, L.D. 1977. Stratigraphic Distribution of Paleocene and Eocene Fossils in the Eastern Gulf Coast Region. *Geological Survey of Alabama, Monograph*, 13(1):1–602
- Wright, A., Sweet, P.W.K., 1924. The Jurassic as a source of oil in western Cuba. *Bulletin of the American Association of Petroleum Geologists*, 8(4):516–519.
- Woodring, W.P. 1982. Geology and paleontology of Canal Zone and adjoining parts of Panama: Description of Tertiary mollusks (Pelecypods: Propeamussiidae to Cuspidariidae). *United States Geological Survey Professional Paper* 306(F).

## CAPTIONS

### Figures

Figure 1: Collecting locality of the Madruga formation, near the city of Madruga, Province of Mayabeque, Cuba. 1.1 Mayabeque province, 1.2 Madruga municipality, and 1.3 Madruga

formation type locality indicated by the red arrow near the railroad bridge. Historical photographs of the construction of the road under the railroad bridge, where the exposed outcrops of the Madruga formation can be seen during construction (1.4) and after (1.5). Figure 2: Geological map section indicating the outcrops associated with the Madruga formation at the collection locality discussed (marked with an asterisk \*). Modified from source: Nunez and Iturralde-Vinent (2016). Madruga formation (md), Paleocene (e1-3), Nazareno formation (nz) lower Eocene (e4-5), Peñalver formation (pn) upper Cretaceous (Cenomanian-Campanian, k1-5), Via Blanca formation (vb), upper Cretaceous (Campanian-Maastrichtian, k5-6), Güines formation (gn), lower Miocene (n1-2), and Cojimar formation (cjr), middle Miocene (n3-4). UB indicate ophiolite outcrops.

Figure 3: *Schedocardia cf. hatchetigbeensis* (MPAL-1001) specimen in the matrix, collected from the Madruga formation.

Figure 4: Details of the *Schedocardia cf. hatchetigbeensis* (MPAL-1001). Note the ovoid foramen on the valve, and the smaller foramina in the space between the ribs, suggesting alternating rows of spines.

Figure 5. *Schedocardia hatchetigbeensis* for comparison. Specimen courtesy of the Alabama Geological Survey to RP.

Figure 6: *Acanthocardia* sp. specimen (MPAL-1002) in the matrix, collected from the indicated outcrop of the Madruga formation.

Figure 7: Historical photograph of the road under the railroad bridge during construction in 1928 (6.1), and the effect of the construction and use of explosives on the natural stratigraphy (6.2).

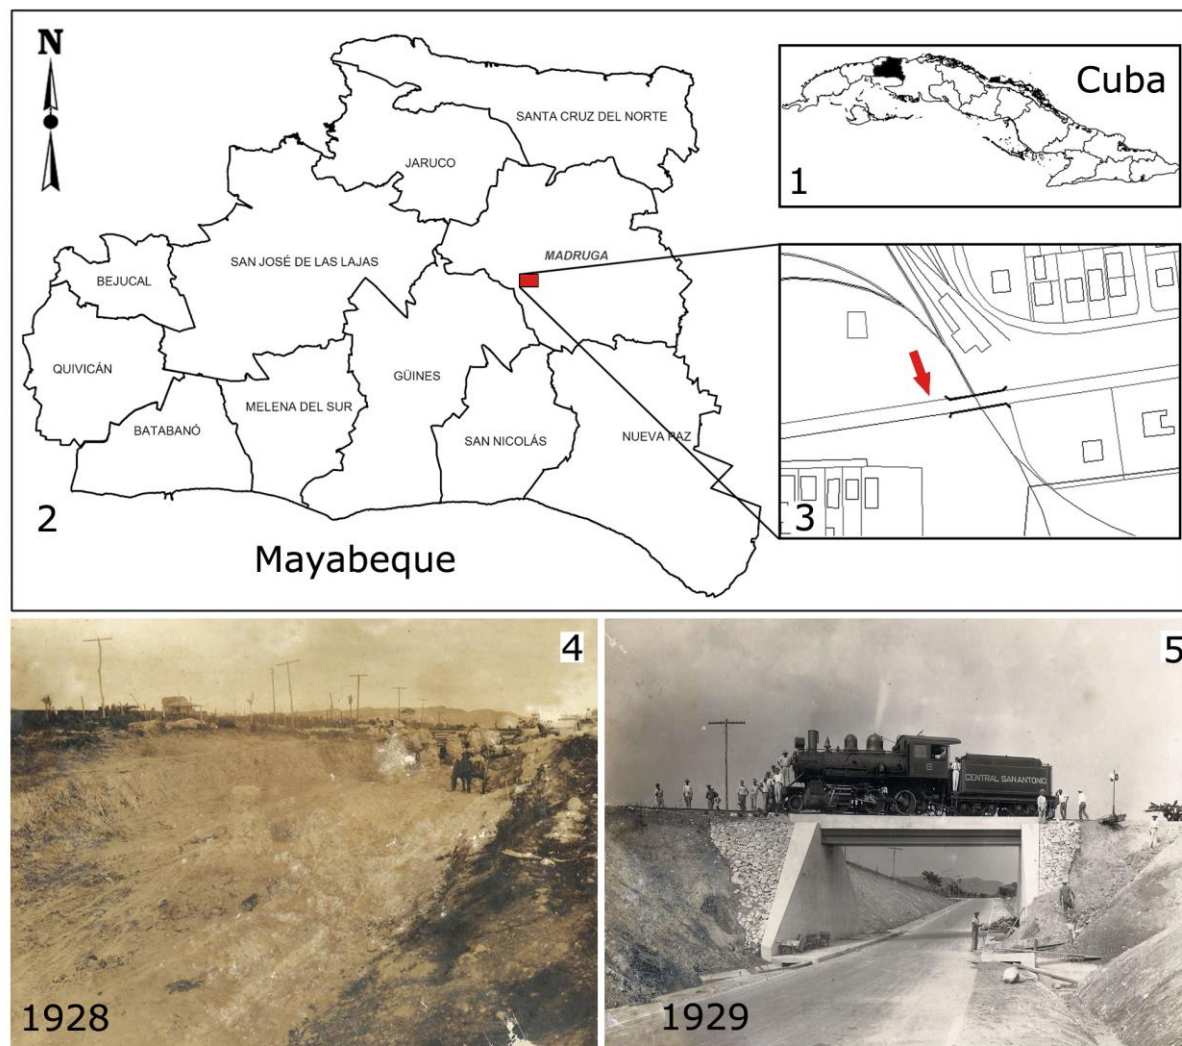

Figure 1.

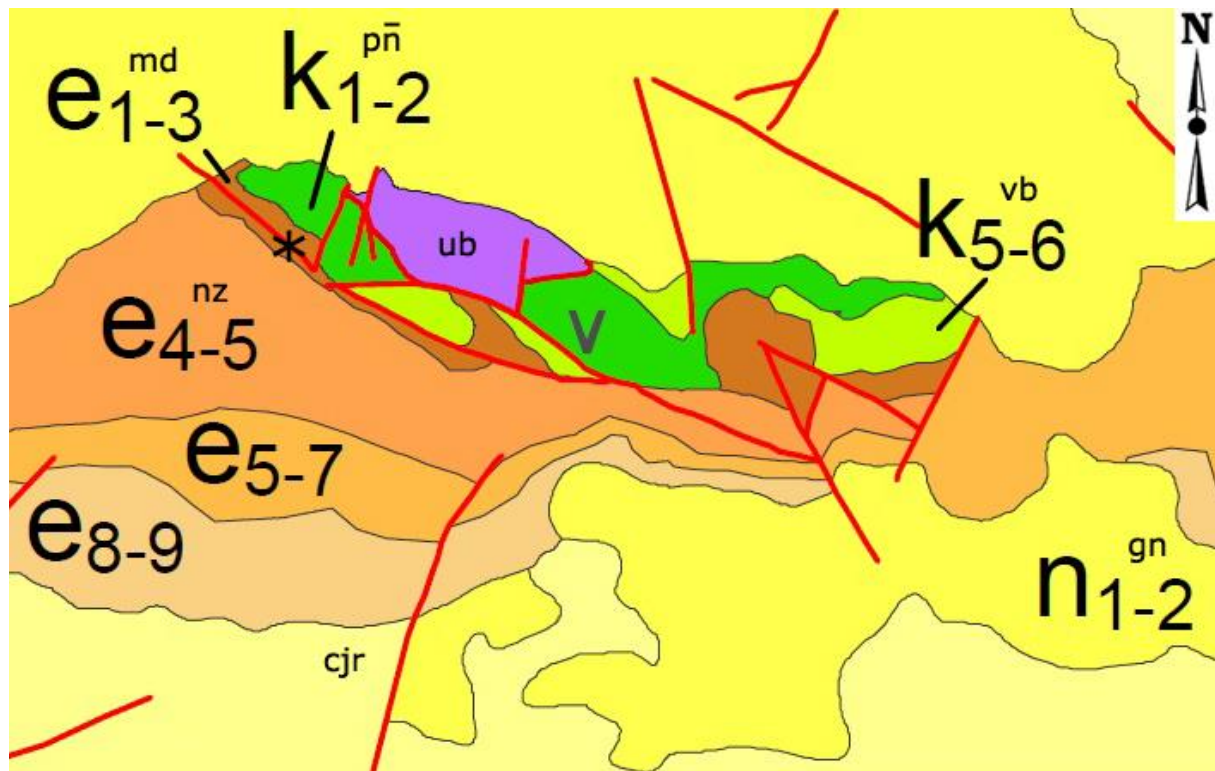

Figure 2.

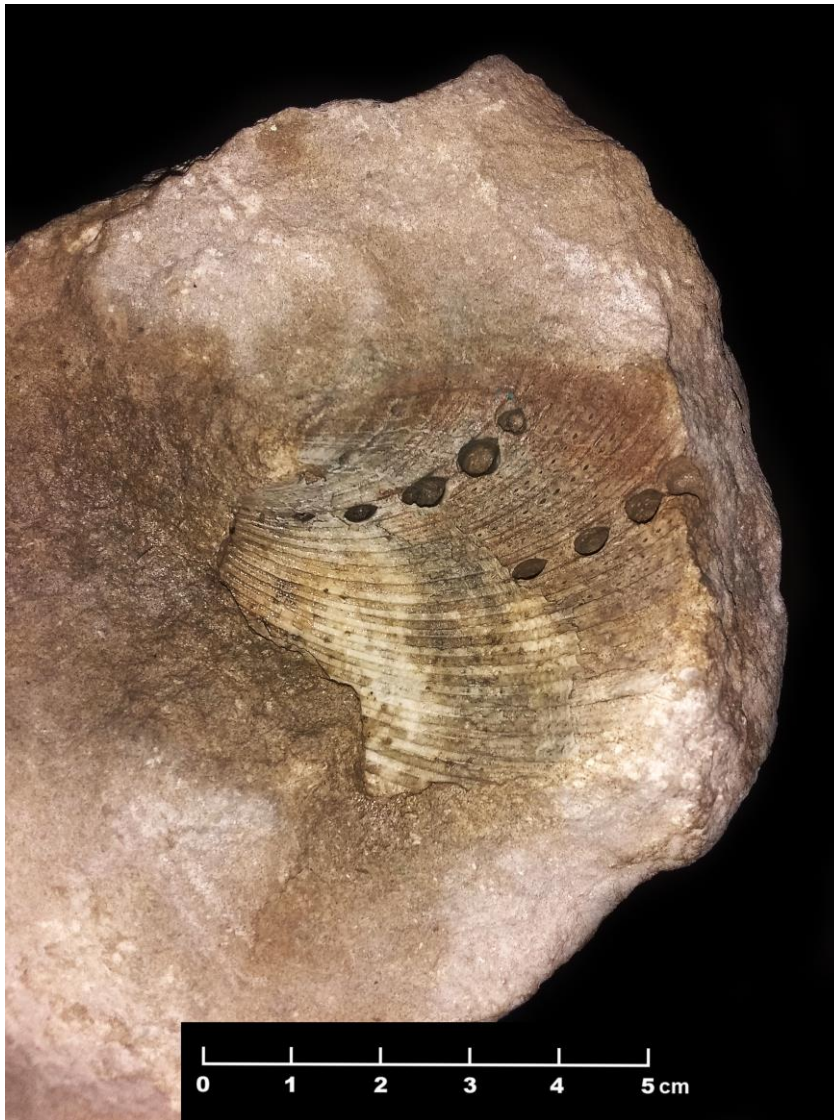

466

467 Figure 3.



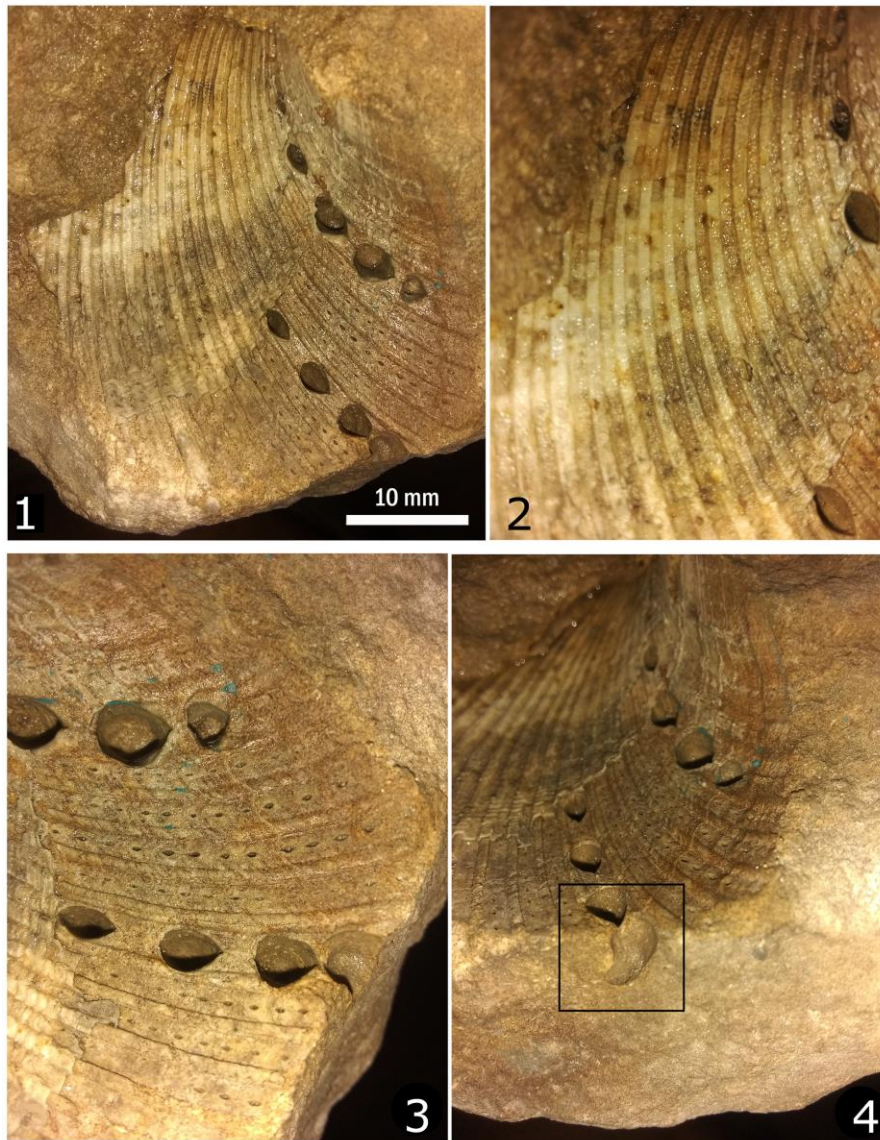

Figure 4.

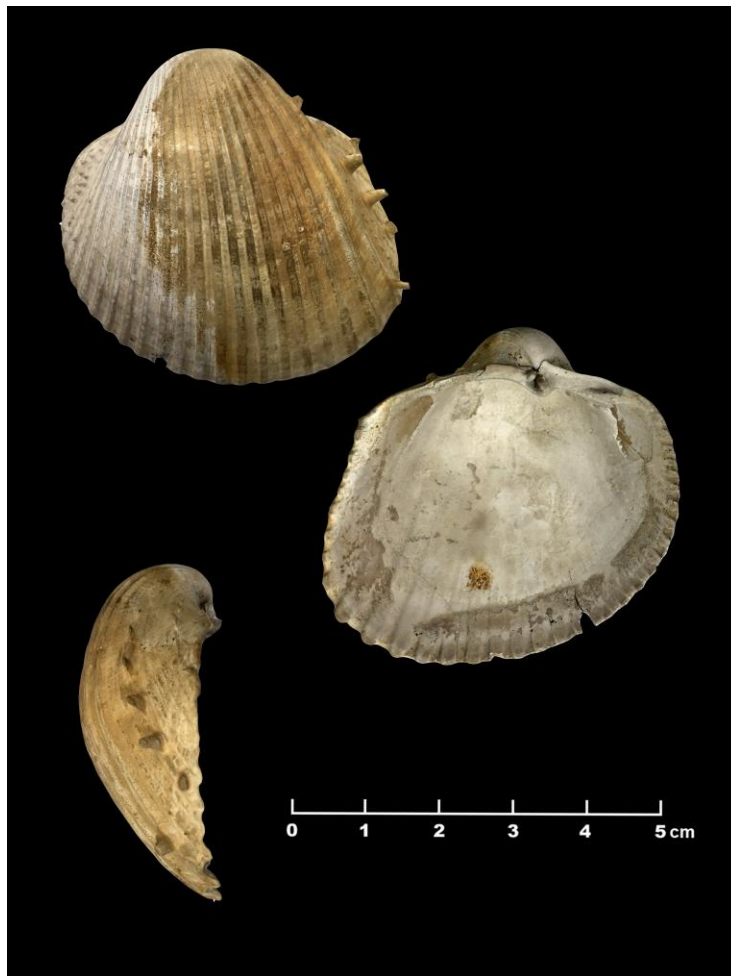

470

471 Figure 5.

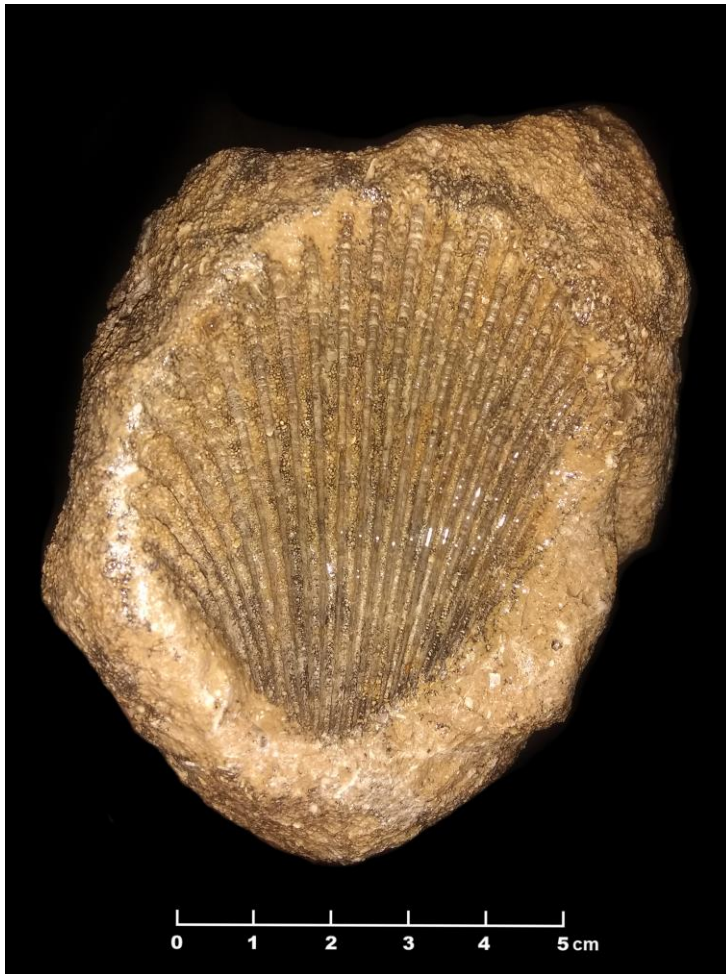

472

473 Figure 6.



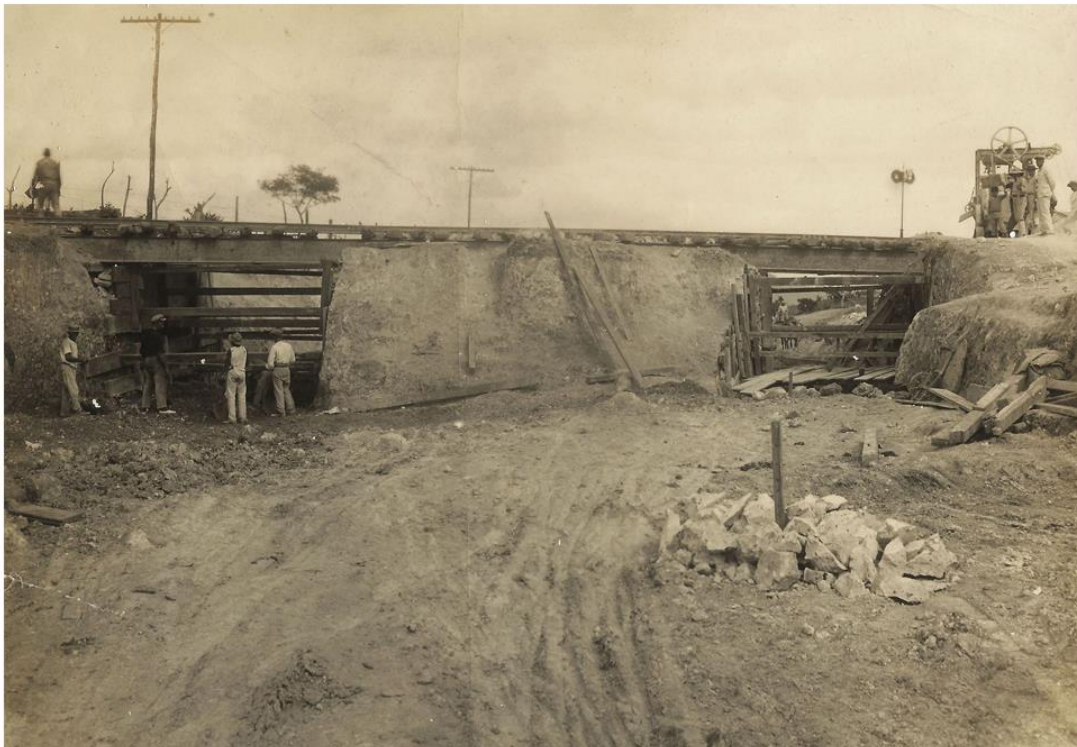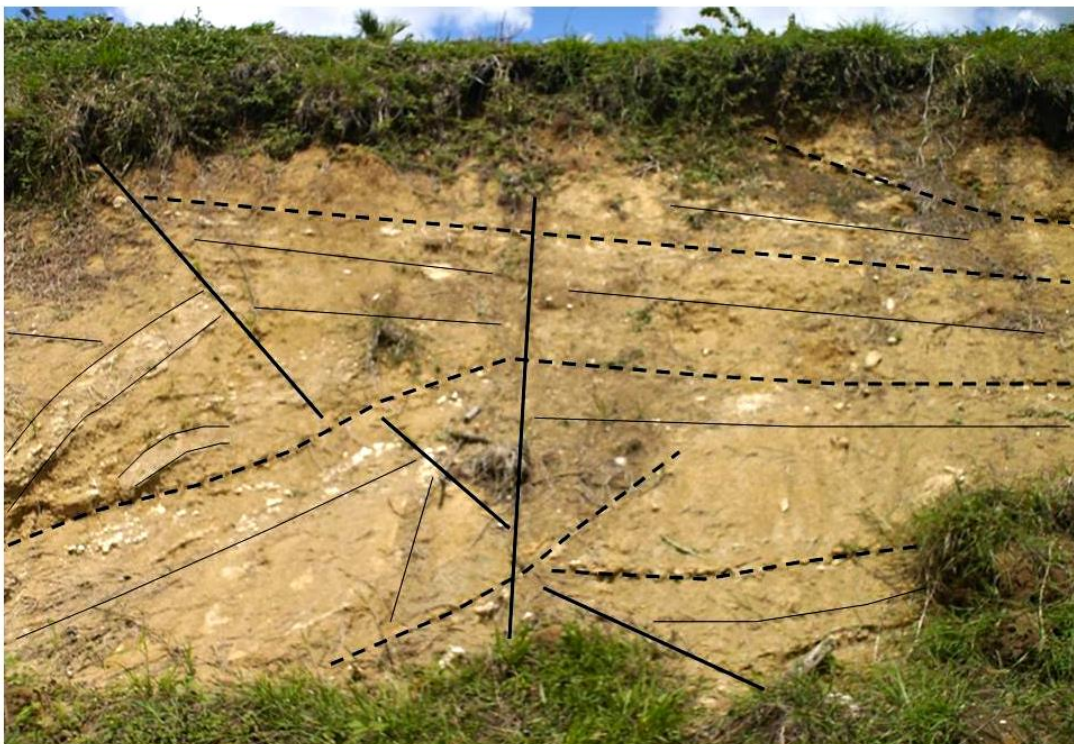

474

475 Figure 7.
